# Supplementary material for: Estimated Prevalence of Cryptococcus Antigenemia (CrAg) among HIV-Infected Adults with Advanced Immunosuppression in Namibia Justifies Routine Screening and Preemptive Treatment
Source: PubMed Central journal article supplement (PMC5070823; doi:10.1371/journal.pone.0161830), 2016-10-19
Supplement: pone.0161830.s001.pdf [file pone.0161830.s001.pdf]

**Table 1. Select demographic and clinical characteristics of sampled patients, sero-survey of *Cryptococcus* antigenemia among HIV-infected adults with advanced immunosuppression in Namibia, 2013-14.**

| <b>Variable</b>                                                  | <b>Result</b>             |
|------------------------------------------------------------------|---------------------------|
| <b>Patient samples included, #</b>                               | 825                       |
| <b>Sex, #, [% (95% CI)]<sup>a</sup></b>                          |                           |
| Female                                                           | 374, [45.9 (42.5 – 49.4)] |
| Male                                                             | 440, [54.1 (50.6 – 57.5)] |
| <b>Age, median (min - max) (IQR) years<sup>b</sup></b>           | 38 (15 - 94) (32 - 46)    |
| <b>Age group, #, [% (95% CI)]</b>                                |                           |
| 15 - 24 years                                                    | 50 [6.2 (4.7 – 8.0)]      |
| 25 - 34 years                                                    | 224 [27.6 (24.6 – 30.7)]  |
| ≥ 35 years                                                       | 539 [66.3 (63.0 – 69.5)]  |
| <b>CD4<sup>+</sup> result, median (IQR) cells/μL<sup>c</sup></b> | 85 (51 - 114)             |
| <b>CD4<sup>+</sup> result strata 1, #, [% (95% CI)]</b>          |                           |
| < 100 cells/μL                                                   | 511, [62.9 (59.7 -66.4)]  |
| 100 - 200 cells/μL                                               | 302, [37.1 (33.9 – 40.5)] |
| <b>CD4<sup>+</sup> result strata 2, #, [% (95% CI)]</b>          |                           |
| < 50 cells/μL                                                    | 194, [23.5 (20.7 – 26.6)] |
| 50 - 200 cells/μL                                                | 630, [76.5 (73.4 – 79.3)] |

<sup>a</sup>. data missing, n=11

<sup>b</sup>. data missing, n=12

<sup>c</sup>. data missing, n=12
