# Supplementary material for: Estimated Prevalence of Cryptococcus Antigenemia (CrAg) among HIV-Infected Adults with Advanced Immunosuppression in Namibia Justifies Routine Screening and Preemptive Treatment
Source: PubMed Central journal article supplement (PMC5070823; doi:10.1371/journal.pone.0161830), 2016-10-19
Supplement: pone.0161830.s002.pdf [file pone.0161830.s002.pdf]

**Table 2. Prevalence and correlates of CrAg positivity among HIV-infected adults with advanced immunosuppression in Namibia, 2013-14.**

| <b>Variable</b>                         | <b>CrAg<br/>Prevalence<br/>(95% CI) <sup>a</sup></b> | <b>Standard error</b> | <b>Relative<br/>standard error</b> | <b>P-value</b> |
|-----------------------------------------|------------------------------------------------------|-----------------------|------------------------------------|----------------|
| <b>Overall</b>                          | 3.3 (2.3 – 4.9)                                      | 0.6                   | 18.6                               |                |
| <b>Sex</b>                              |                                                      |                       |                                    |                |
| Female                                  | 2.9 (1.6 – 5.2)                                      | 0.9                   | 29.7                               | 0.58           |
| Male                                    | 3.6 (2.2 – 5.9)                                      | 0.9                   | 24.6                               |                |
| <b>Age</b>                              |                                                      |                       |                                    |                |
| 15 - 34 years                           | 4.0 (2.2 – 7.1)                                      | 1.2                   | 29.6                               | 0.43           |
| ≥ 35 years                              | 3.0 (1.8 – 4.8)                                      | 0.7                   | 24.7                               |                |
| <b>CD4<sup>+</sup> count strata 1 ,</b> |                                                      |                       |                                    |                |
| < 100 cells/μL                          | 3.9 (2.5 – 6.0)                                      | 0.9                   | 21.9                               | 0.22           |
| 100 - 200 cells/μL                      | 2.3 (1.1 – 4.8)                                      | 0.9                   | 37.4                               |                |
| <b>CD4<sup>+</sup> count strata 2,</b>  |                                                      |                       |                                    |                |
| < 50 cells/μL                           | 7.2 (3.6 – 11.3)                                     | 1.8                   | 24.4                               | 0.001          |
| 50 - 200 cells/μL                       | 2.2 (1.5 – 2.9)                                      | 0.3                   | 14.2                               |                |

*a. 95% confidence intervals are binomial exact, two-sided CI interval where no cases of CrAg were detected.*
